# Supplementary material for: Microenvironmental niche divergence shapes BRCA1-dysregulated ovarian cancer morphological plasticity
Source: PubMed Central journal article supplement (PMC6156340; doi:10.1038/s41467-018-06130-3), 2018-09-25
Supplement: 41467_2018_6130_MOESM1_ESM.pdf [file 41467_2018_6130_MOESM1_ESM.pdf]

## **Supplementary Information**

**Heindl et al.**

**Microenvironmental niche divergence shapes BRCA1-dysregulated  
ovarian cancer morphological plasticity**

## Supplementary Figures

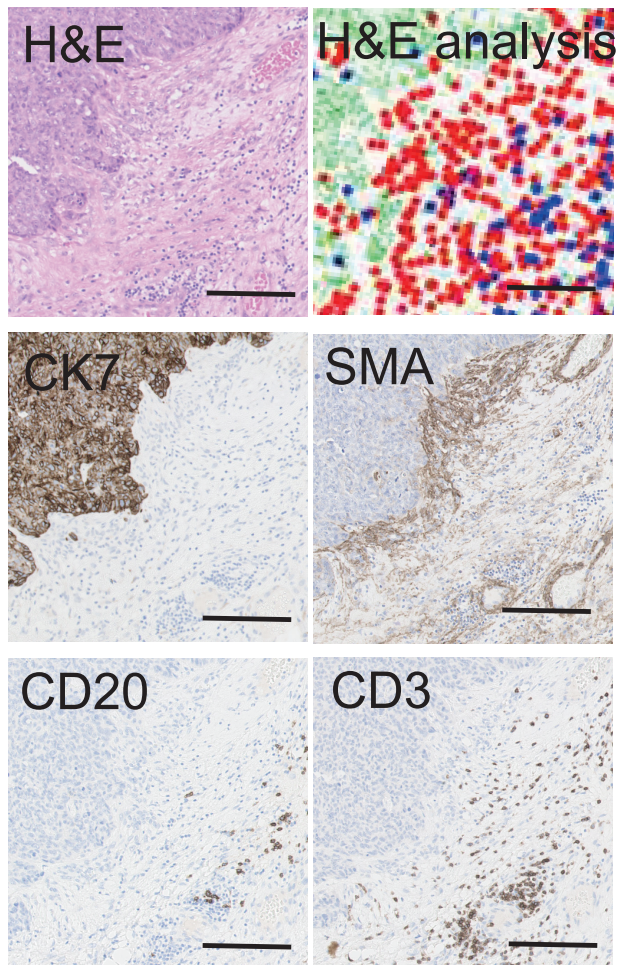

**Supplementary Figure 1. Illustrative example of serial sections of immunohistochemistry and H&E.**

### Microenvironmental subtypes

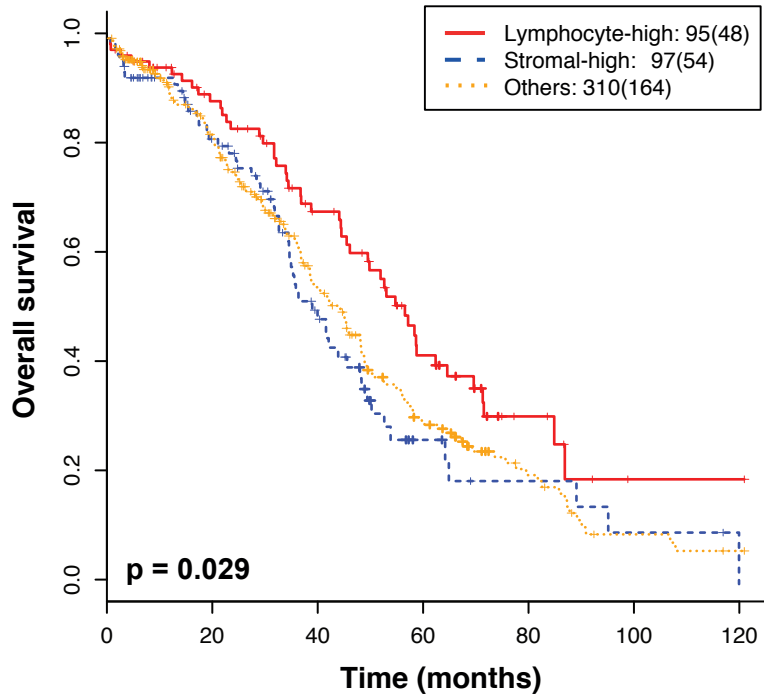

Supplementary Figure 2. Survival analysis of microenvironmental subtypes.

**A Tissue area versus diversification**

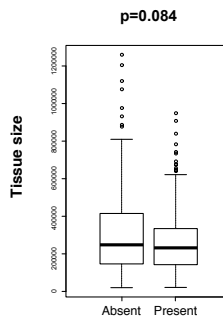

**B Debulking vesus diversification**

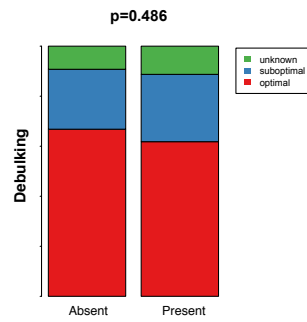

**C Cellularity vesus diversification**

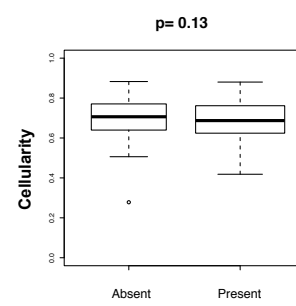

**Supplementary Figure 3. Diversification and tissue size and debulking status.**

A. Boxplot showing the tissue area (in pixels) for all 514 patients stratified by diversification. B. Barplot illustrates distribution of debulking status stratified by diversification. C. Boxplot illustrating the difference in cellularity stratified by diversification.

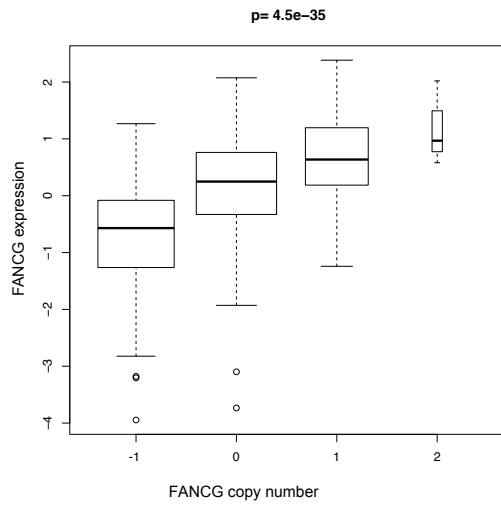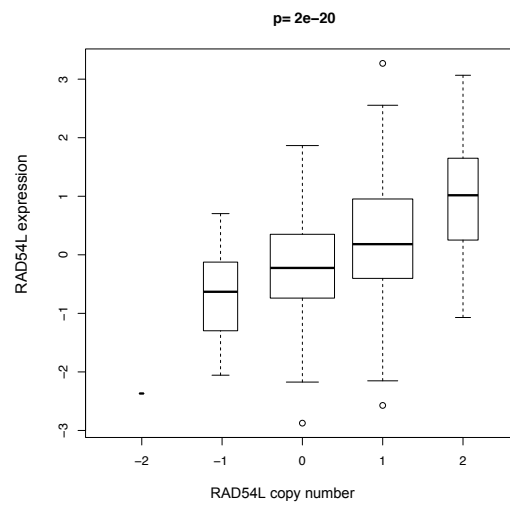

**Supplementary Figure 4. Association between copy number and gene expression of FANCG and RAD54L.**

### BRCA1 mutation and morphological diversification

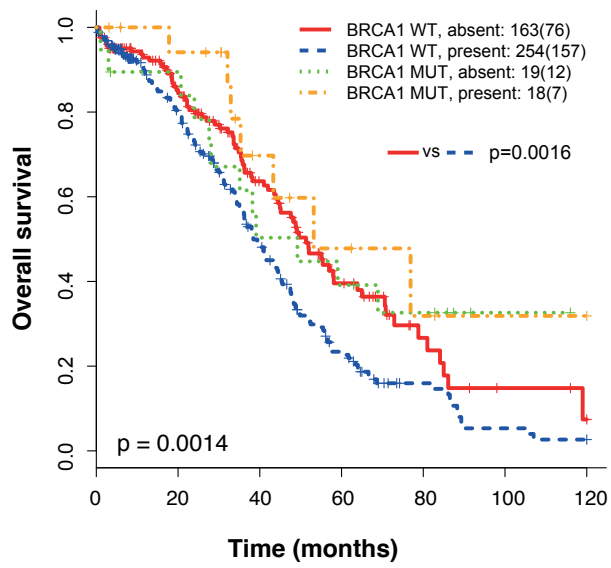

**Supplementary Figure 5. Survival analysis of patients stratified by BRCA1 mutation and morphological diversification.** Kaplan-Meier plot depicting differences in OS according to *BRCA1* mutation (wildtype WT or mutated MUT) and morphological diversification.

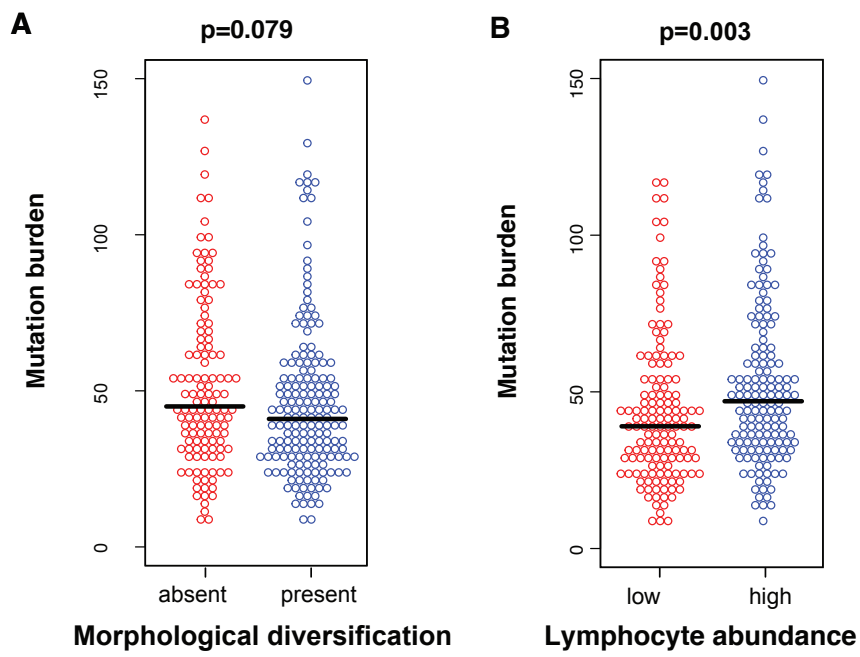

Supplementary Figure 6. Swarmplot to demonstrate the difference in mutation burden according to A. morphological diversification and B. lymphocyte abundance.

## Overall survival stratified by lymphocyte abundance, mutation burden and diversification

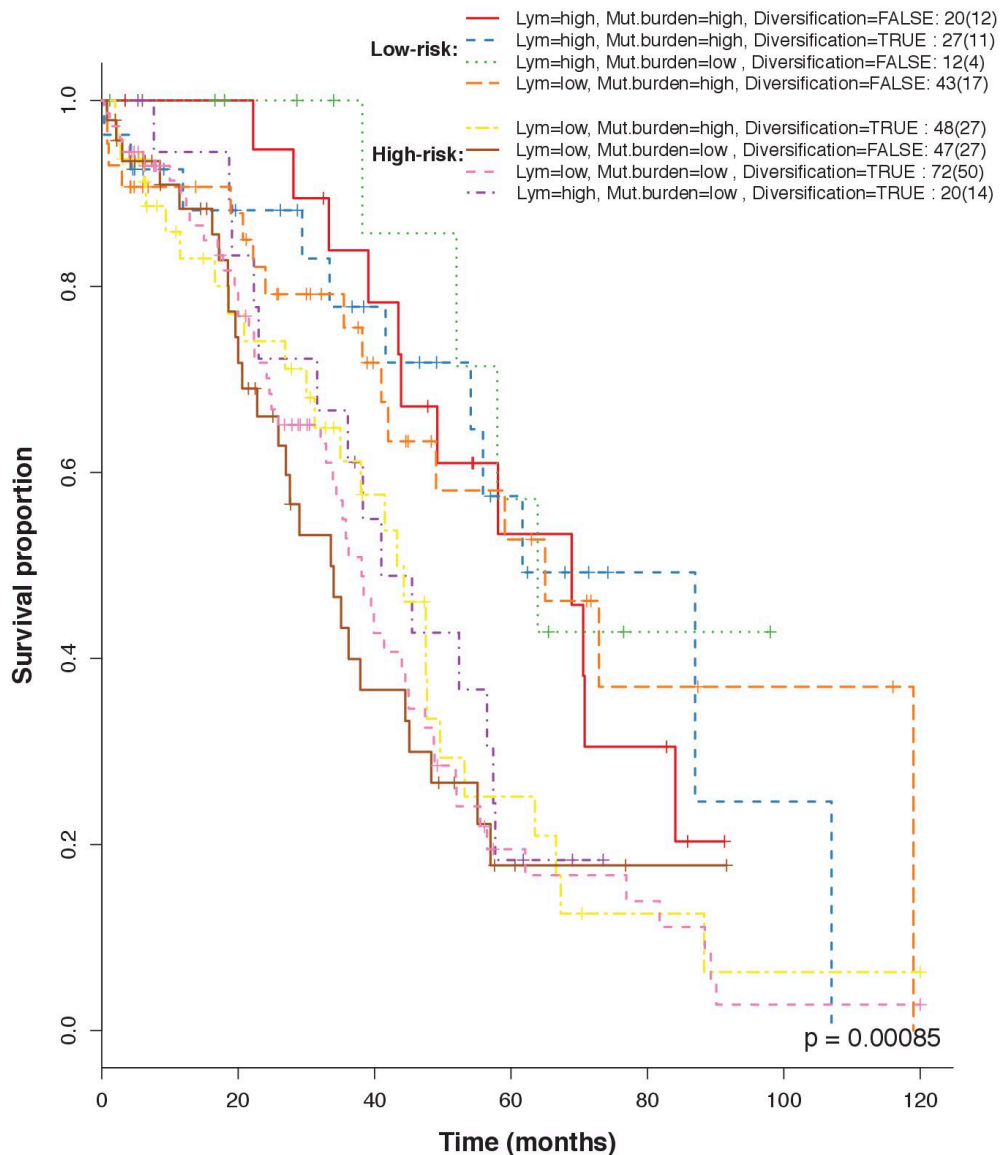

**Supplementary Figure 7. Survival analysis of mutation burden, lymphocyte abundance and diversification.** Kaplan-Meier curves to demonstrate the differences in OS according to lymphocyte abundance, mutation burden and diversification, revealing two visual groups with different outcomes, which would not have been found without any of the three measures.



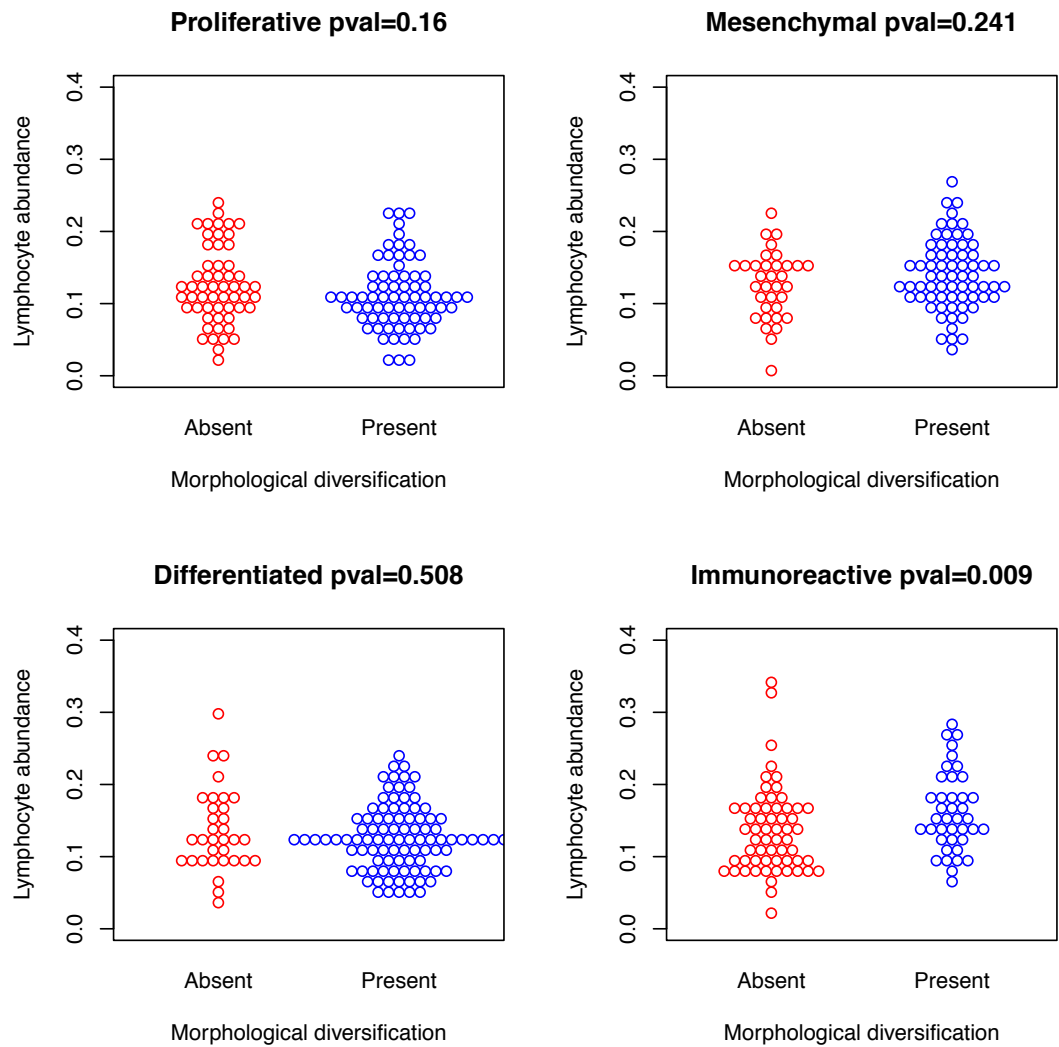

**Supplementary Figure 8. Subtype-specific effects on the association between morphological diversification and lymphocyte abundance.**

**Supplementary Table 1.** Enrichment analysis of pathways for genes correlated with abundance of cancer cells, lymphocytes and stromal cells.

| Cell Type | Universe Size | Expected Hits | Observed Hits | Gene Set Size | Adjusted Pvalue | Gene Set Term                                                  |
|-----------|---------------|---------------|---------------|---------------|-----------------|----------------------------------------------------------------|
| Cancer    | 1             | 0.763118912   | 9             | 34            | 5.40E-05        | KEGG_DNA_REPLICATION                                           |
|           | 2             | 0.650895542   | 8             | 29            | 0.00011         | REACTOME_DNA_STRAND_ELONGATION                                 |
|           | 3             | 0.740674238   | 8             | 33            | 0.00022         | REACTOME_ACTIVATION_OF_ATR_IN_RESPONSE_TO_REPLICATION_STRESS   |
|           | 4             | 0.875342281   | 8             | 39            | 0.00064         | REACTOME_G2_M_CHECKPOINTS                                      |
|           | 5             | 0.650895542   | 7             | 29            | 7.00E-04        | REACTOME_ACTIVATION_OF_THE_PRE_REPLICATIVE_COMPLEX             |
|           | 6             | 1.279346411   | 9             | 57            | 0.00097         | REACTOME_TELOMERE_MAINTENANCE                                  |
|           | 7             | 0.314225434   | 5             | 14            | 0.0015          | REACTOME_REPAIR_SYNTHESIS_FOR_GAP_FILLING_BY_DNA_POL_IN_TC_NER |
|           | 8             | 2.109799345   | 11            | 94            | 0.0015          | REACTOME_CHROMOSOME_MAINTENANCE                                |
|           | 9             | 7.743412488   | 22            | 345           | 0.0018          | REACTOME_CELL_CYCLE                                            |
|           | 10            | 0.583561521   | 6             | 26            | 0.0022          | REACTOME_EXTENSION_OF_TELOMERES                                |
| Immune    | 1             | 3.725815864   | 15            | 166           | 0.0012          | KEGG_CHEMOKINE_SIGNALING_PATHWAY                               |
|           | 2             | 4.219598689   | 16            | 188           | 0.0012          | KEGG_FOCAL_ADHESION                                            |
|           | 3             | 2.379135431   | 12            | 106           | 0.0012          | KEGG_LEUKOCYTE_TRANSENDOTHELIAL_MIGRATION                      |
|           | 4             | 0.673340216   | 7             | 30            | 0.0012          | PID_INTEGRIN_A4B1_PATHWAY                                      |
|           | 5             | 2.289356736   | 12            | 102           | 0.0012          | REACTOME_SIGNALING_BY_ILS                                      |
|           | 6             | 0.965120977   | 8             | 43            | 0.0012          | REACTOME_IL_3_5_AND_GM-CSF_SIGNALING                           |
|           | 7             | 2.087354671   | 11            | 93            | 0.0014          | PID_CXCR4_PATHWAY                                              |
|           | 8             | 1.054899672   | 8             | 47            | 0.0014          | PID_PI3KCI_PATHWAY                                             |
|           | 9             | 5.139830318   | 17            | 229           | 0.0024          | KEGG_CYTOKINE_CYTOKINE_RECEPTOR_INTERACTION                    |
|           | 10            | 11.62634107   | 28            | 518           | 0.0024          | REACTOME_SIGNALING_BY_GPCR                                     |
| Stromal   | 1             | 16.99061813   | 62            | 757           | 1.20E-15        | NABA_MATRISOME                                                 |
|           | 2             | 4.488934776   | 27            | 200           | 5.10E-11        | NABA_CORE_MATRISOME                                            |
|           | 3             | 1.683350541   | 15            | 75            | 4.20E-08        | REACTOME_EXTRACELLULAR_MATRIX_ORGANIZATION                     |
|           | 4             | 1.010010325   | 12            | 45            | 6.60E-08        | PID_SYNDECAN_1_PATHWAY                                         |
|           | 5             | 5.117385644   | 22            | 228           | 2.60E-06        | REACTOME_AXON_GUIDANCE                                         |
|           | 6             | 3.074920321   | 17            | 137           | 2.60E-06        | NABA_ECM_GLYCOPROTEINS                                         |
|           | 7             | 7.878080531   | 27            | 351           | 5.00E-06        | REACTOME_DEVELOPMENTAL_BIOLOGY                                 |
|           | 8             | 0.740674238   | 9             | 33            | 5.00E-06        | NABA_COLLAGENS                                                 |
|           | 9             | 12.50168335   | 35            | 557           | 7.10E-06        | NABA_MATRISOME_ASSOCIATED                                      |
|           | 10            | 1.077344346   | 10            | 48            | 1.10E-05        | REACTOME_COLLAGEN_FORMATION                                    |
