# Supplementary material for: Microenvironmental niche divergence shapes BRCA1-dysregulated ovarian cancer morphological plasticity
Source: PubMed Central journal article supplement (PMC6156340; doi:10.1038/s41467-018-06130-3), 2018-09-25
Supplement: 41467_2018_6130_MOESM2_ESM.pdf [file 41467_2018_6130_MOESM2_ESM.pdf]

## **Supplementary Data:**

**Supplementary Data 1. Immunohistochemistry scores for H&E image analysis validation.** Each row is a sample and columns denote the following information: Cancer, Lym, Stromal: percentage of cells from H&E calculated by averaging regional scores; CK7, CD3, SMA: sample-level scores from IHC calculated as the average of regional scores; CK7cancer, CD3lym and SMAstromal: spatial correlation between IHC CK7/CD3/SMA and H&E-based estimate of cancer/lymphocyte/stromal abundance; CD3Gal3: spatial correlation between CD3 and galectin-3 expression; RegVal\_HECK7/CD3/SMA/Average/std: DICE coefficient measuring the overlap between HE and registered CD7, CD3 and SMA, their average and standard deviation. DIV\_gal3: average galectin-3 expression in diversified regions; DIVnot\_gal3: average galectin-3 expression in non-diversifying regions. NaN: no diversification region detected.

**Supplementary Data 2. Differential gene expression analysis results.**

**Supplementary Data 3. Enrichment analysis of genes differentially expressed in the diversified samples.**

**Supplementary Data 4. Copy number enrichment analysis result.**

**Supplementary Data 5. Methylation data analysis result.**

**Supplementary Data 6. A summary of calculated somatic mutational and neoantigen load for the 40 patients with data available in the Immunoreactive subtype.** (ID=TCGA patient ID; DIVER=whether tumor morphological diversification is observed (TRUE) or not (FALSE); #MUTS\_TCGA=(somatic)mutational load as calculated by TCGA; #MUTS=(somatic)mutational load as calculated by us with the variant calling protocol described above (includes: missense, inframe\_insertion, inframe\_deletion, frameshift, stop\_lost and stop\_gained variants); #STRONG\_B=neoantigen load according to predicted strong binders (rank-based); #WEAK\_B=neoantigen load according to predicted weak binders (rank-based); #STRONG\_B+#WEAK\_B=neoantigen load according to predicted strong binders plus predicted weak binders (rank-based); #
